# Supplementary material
Source: publisher figshare collection journal article supplement (https://frontiersin.figshare.com/ndownloader/files/23425883)

**Supplementary Figure 3.** Straw yield at 0%, 50% and 100% recommended dose of fertilizer (RDF) in combination with biofertilizer. Effect of combined biofertilizer inoculation on straw yield of finger millet (dark shaded bars) and pigeon pea (light shaded bars) in the intercropping system at the 0% and at 50 % RDF as compared to no inoculation at 0%, 50% and 100% RDF. Significant differences among means were calculated crop wise across fertilizer levels. Each error bar represents +1 standard deviation of the mean. Alpha ( $\alpha$ ) and beta ( $\beta$ ) above the bars indicate letters of significance for combined yields finger millet and pigeon pea. Bars not sharing the same letters are significantly different at  $p < 0.05$ .

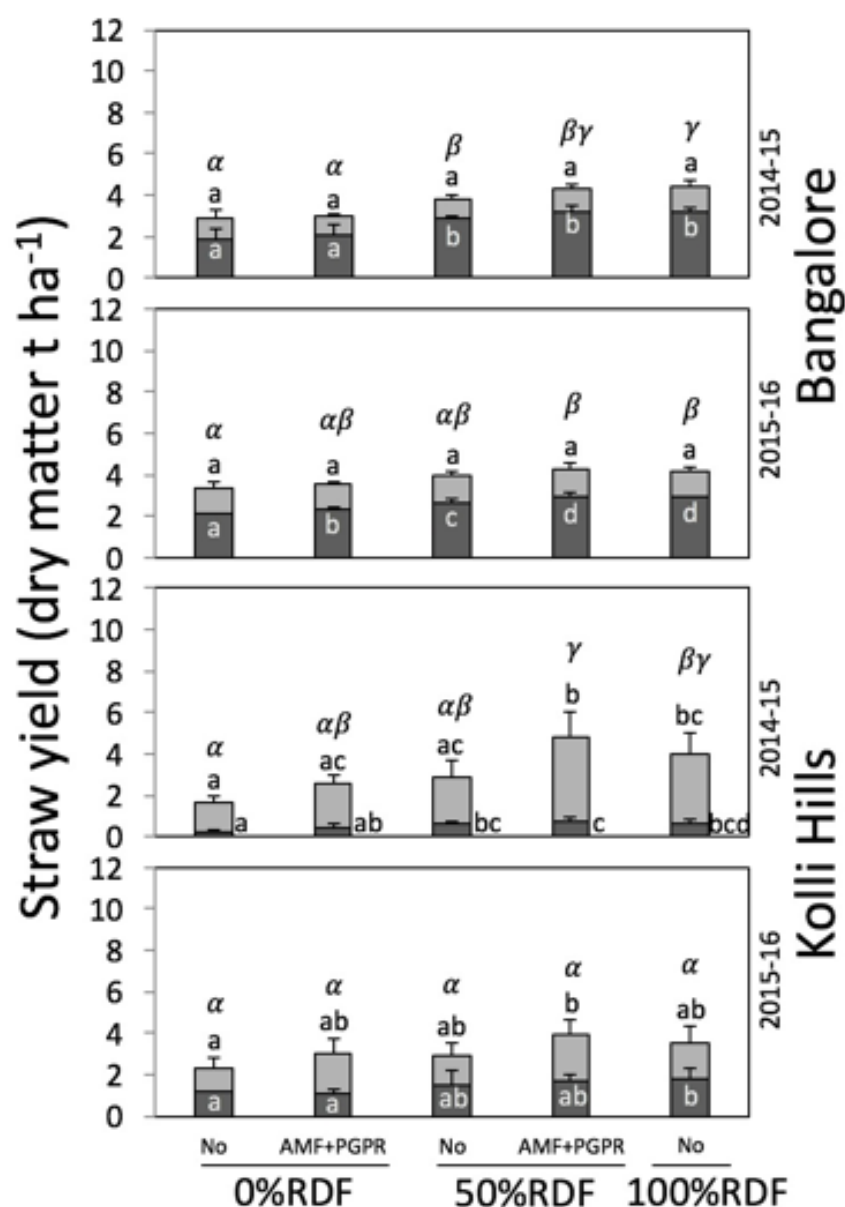

Supplement: Supplementary file 1 [file 23425883]
